# Supplementary material for: Deposited structure design of epoxy composites with excellent electromagnetic interference shielding performance and balanced mechanical properties
Source: Royal Society of Chemistry journal article supplement (doi:10.1039/d0tc03697h), 2020-01-01
Supplement: d0tc03697h1.pdf [file d0tc03697h1.pdf]

**Deposited structure design of epoxy composites with excellent electromagnetic interference shielding performance and balanced mechanical properties**

Qingsong Lian<sup>a\*</sup>, Weijie Xu<sup>a</sup>, Yan Li<sup>b</sup>, Hongfeng Chen<sup>a</sup>, Hongji Duan<sup>a</sup>, Zhi Wang<sup>a,c</sup>,  
Dong An<sup>a</sup>, Guizhe Zhao<sup>a</sup>, Yaqing Liu<sup>a\*</sup>

<sup>a</sup>College of Materials Science and Engineering, Key Laboratory of Functional Nanocomposites of Shanxi Province, North University of China, Taiyuan 030051, People's Republic of China

<sup>b</sup>Department of Materials Application Research, AVIC Manufacturing Technology Institute, Beijing 100024, China

<sup>c</sup>Department of Chemistry and the Materials Research Center, Northwestern University, 2145 Sheridan Road, Evanston, Illinois 60208, United States

\* Corresponding author. Tel. /fax: +86 0351 3559669

E-mail address: [lianqs@nuc.edu.cn](mailto:lianqs@nuc.edu.cn) (Qingsong Lian),

[lyq@nuc.edu.cn](mailto:lyq@nuc.edu.cn) (Yaqing Liu)

## 1. Electromagnetic Interference (EMI) Shielding Measurements

The physical parameters for evaluating the EMI performance can be calculated based on the scattering parameters ( $S_{11}$  and  $S_{21}$ ). The relevant formulas are shown as follows:

$$R = |S_{11}|^2$$

$$T = |S_{21}|^2$$

$$A + R + T = 1$$

$$\text{SETotal} = -10 \log T$$

$$\text{SER} = -10 \log (1 - R)$$

$$SEA = SE_{Total} - SER$$

where  $A$ ,  $R$  and  $T$  are the absorption, reflection and transmission coefficients, respectively.  $SE_{Total}$ ,  $SE_R$ , and  $SE_A$  are the total, reflective, and absorptive EMI shielding effectiveness, respectively.

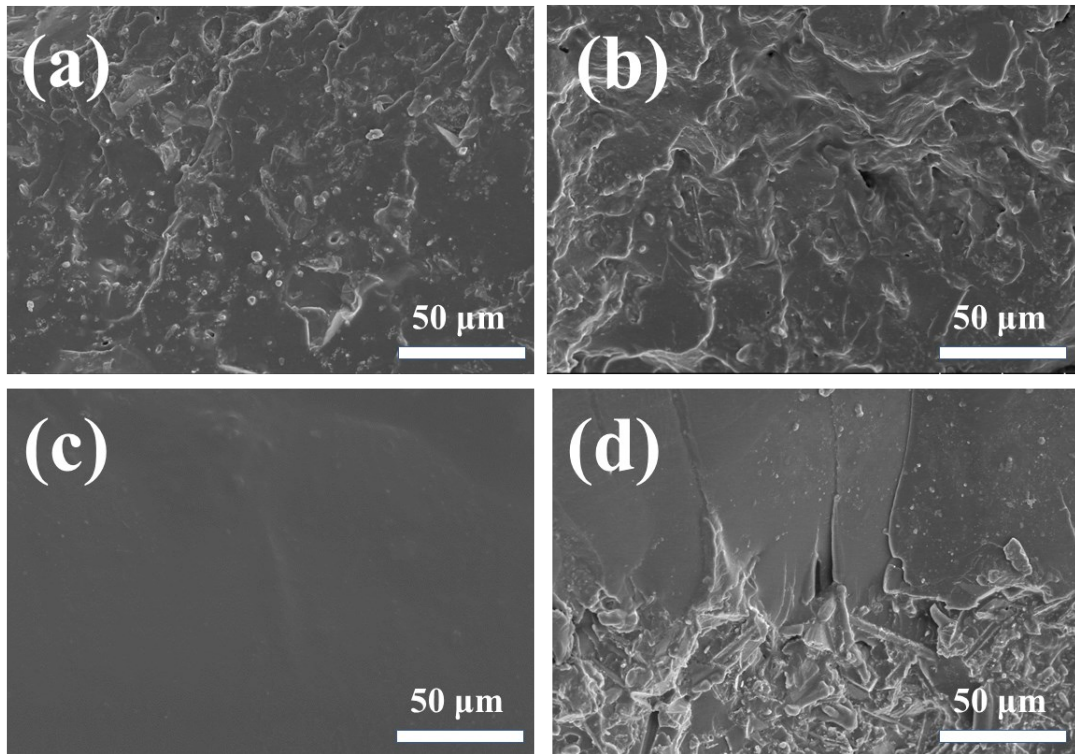

**Figure S1.** SEM images of cold-fractured interface morphologies close to the upper layer of T-ZnO/Ag/EP samples prepared by: (a) ISP method; (b) SB method; (c)(d) MISP method.

**Table S1.** Electrical conductivity on the bottom surface of  $EP_{T-X}$  systems.

| System      | Conductivity on the bottom surface of sample (S/m) |
|-------------|----------------------------------------------------|
| $EP_{T-5}$  | $5390 \pm 74$                                      |
| $EP_{T-10}$ | $12080 \pm 180$                                    |
| $EP_{T-15}$ | $18530 \pm 698$                                    |
| $EP_{T-20}$ | $31840 \pm 1360$                                   |

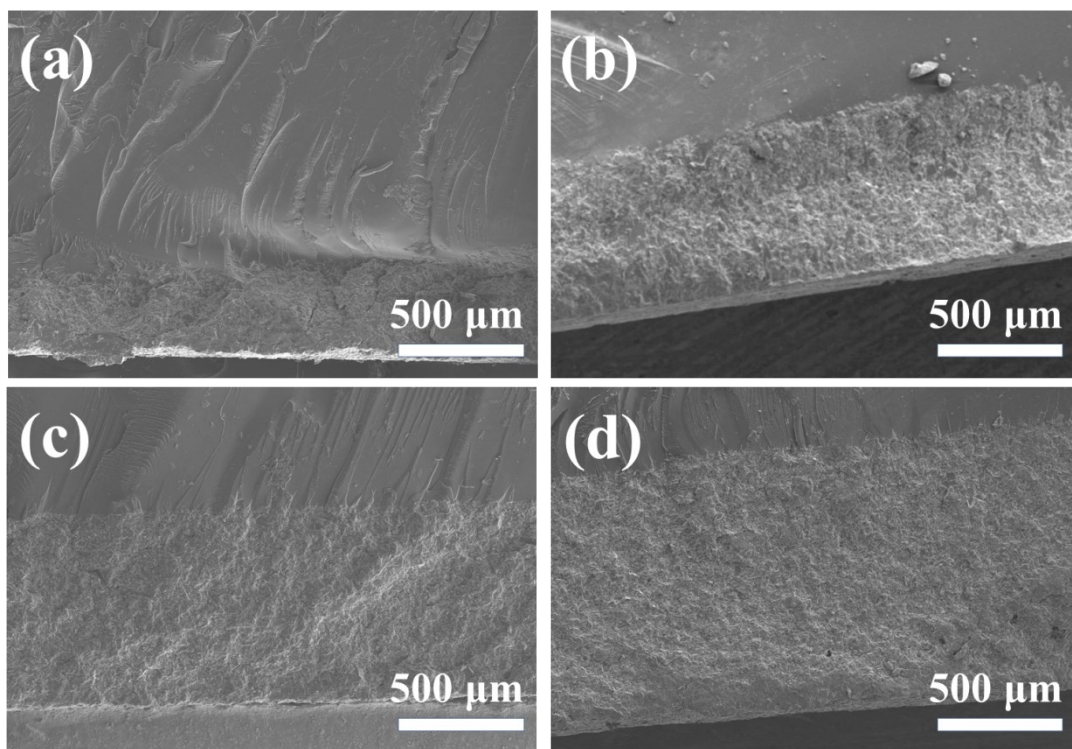

**Figure S2.** SEM images of the EP<sub>T-X</sub> systems: (a) EP<sub>T-5</sub> sample; (b) EP<sub>T-10</sub> sample; (c) EP<sub>T-15</sub> sample; (d) EP<sub>T-20</sub> sample.

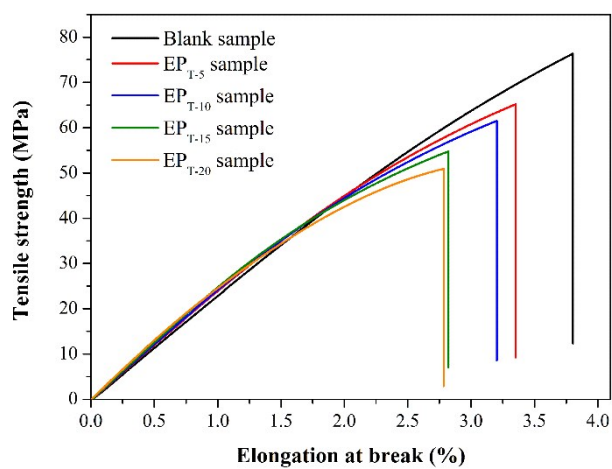

**Figure S3.** Strain-stress curves of blank sample and all the EP<sub>T-X</sub> systems.

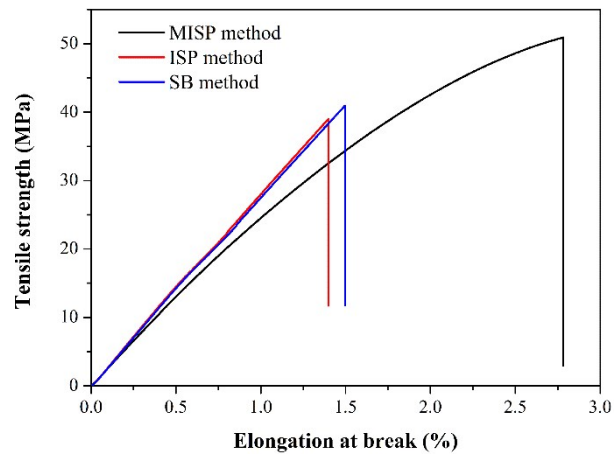

**Figure S4.** Strain-stress curves of T-ZnO/Ag/EP composites (with 20 wt% T-ZnO/Ag content) prepared by different processing method.
